# Supplementary material
Source: PubMed Central journal article supplement (PMC7036766)
Supplement: an9b01714_si_001.pdf [file an9b01714_si_001.pdf]

## Supporting Information

### **Confinement Effects and Charge Dynamics in Zn<sub>3</sub>N<sub>2</sub> Colloidal Quantum Dots: Implications for QD-LED displays.**

Ruben Ahumada-Lazo<sup>1</sup>, Simon M. Fairclough<sup>2‡</sup>, Samantha J. O. Hardman<sup>3</sup>, Peter N. Taylor<sup>4</sup>, Mark Green<sup>5</sup>, Sarah J. Haigh<sup>2</sup>, Rinku Saran<sup>6†</sup>, Richard J. Curry<sup>6</sup> and David J. Binks<sup>1\*</sup>.

<sup>1</sup>Department of Physics and Astronomy and the Photon Science Institute, <sup>2</sup>Department of Materials, <sup>3</sup>Manchester Institute of Biotechnology, The University of Manchester, Manchester, M13 9PL, <sup>4</sup>Sharp Laboratories of Europe Ltd, Edmund Halley Road, Oxford Science Park, Oxford, OX4 4GB, UK, <sup>5</sup>Department of Physics, King's College London, Strand, London, UK WC2R 2LS. <sup>6</sup>Photon Science Institute, Department of Electrical and Electronic Engineering, The University of Manchester, Manchester, M13 9PL, United Kingdom.

Present addresses:

<sup>‡</sup>Cambridge Centre for Gallium Nitride, University of Cambridge, Cambridge, CB3 0FS, United Kingdom,

<sup>†</sup>NanoScience Technology Center, University of Central Florida, Orlando, Florida 32826, USA.

\*Authors to whom correspondence should be addressed, electronic email:

[david.binks@manchester.ac.uk](mailto:david.binks@manchester.ac.uk)

## S1. TEM images and size frequency histograms

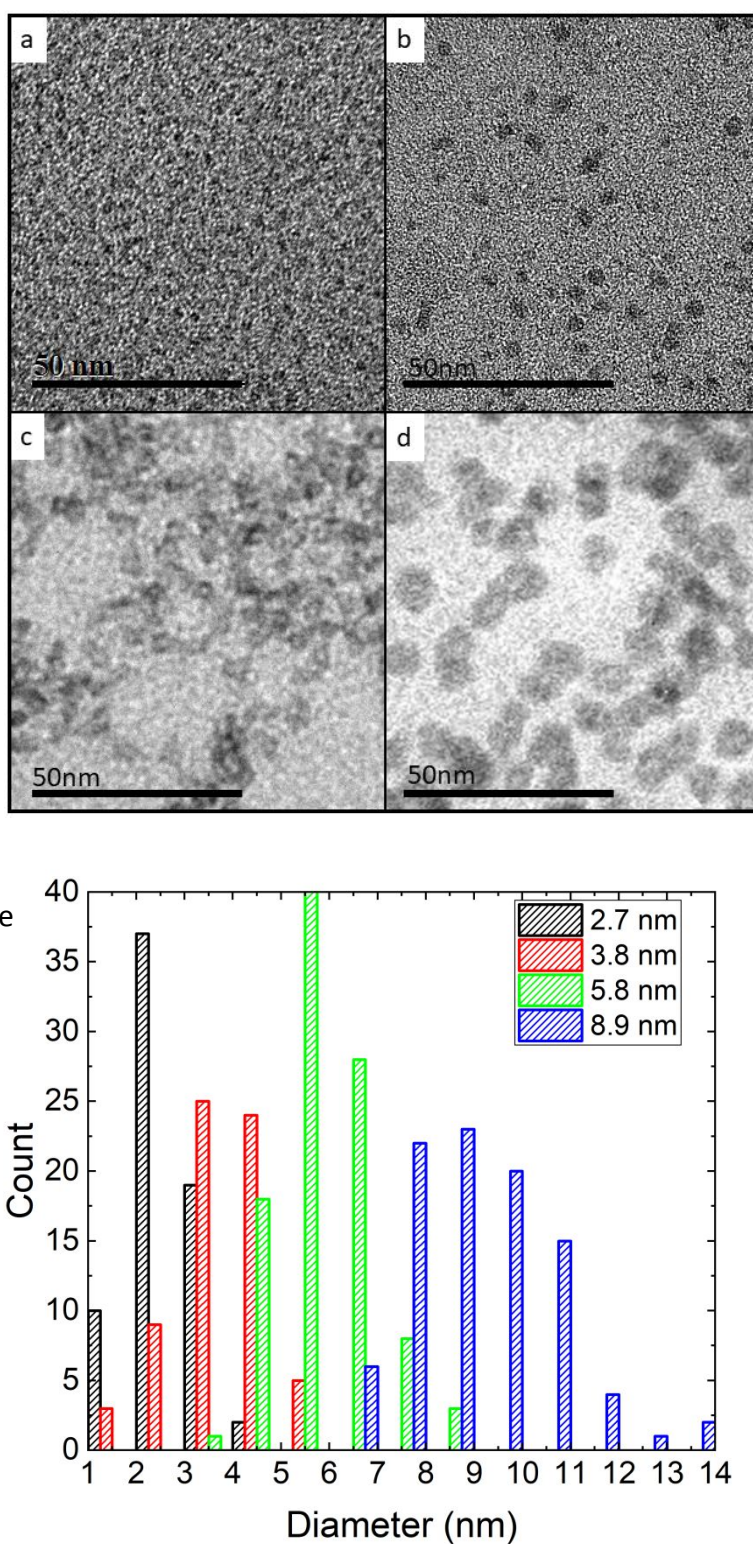

**Figure S1.** TEM images of Zn<sub>3</sub>N<sub>2</sub> samples with average diameters,  $D$ , of a) 2.7 nm b) 3.8 nm, c) 5.8 nm and d) 8.9 nm. e) Size frequency histograms of the Zn<sub>3</sub>N<sub>2</sub> samples. The standard deviations of the size distribution for each sample are 23%, 20%, 17% and 18%, respectively.

## S2. Second derivative of the absorption spectra.

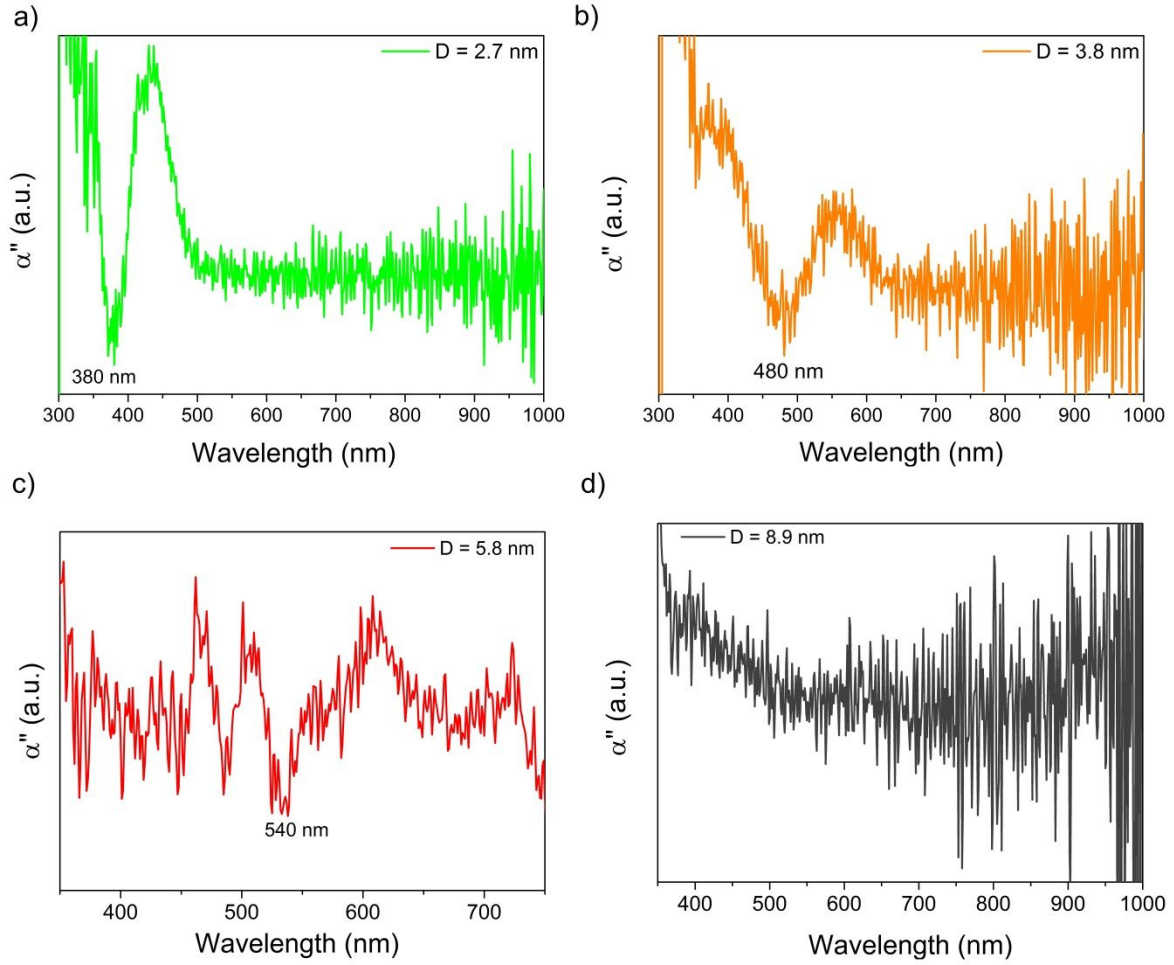

**Figure S2.** Second derivative  $\alpha''$  of the steady-state absorption spectra for samples with average diameters of a) 2.7 nm, b) 3.8 nm, c) 5.8 nm and d) 8.9 nm.

**Table S1. Dielectric constant and effective masses found in literature**

| Dielectric constant<br>$\epsilon_r$ | Electron effective mass<br>$m_e$ | Hole effective mass<br>$m_h$ |
|-------------------------------------|----------------------------------|------------------------------|
| 5.29 <sup>1</sup>                   | 0.29 $m_o$ <sup>1,4</sup>        | 0.99 $m_o$ <sup>6</sup>      |
| 2.89 – 5.76 <sup>2</sup>            | 0.27 $m_o$ <sup>5</sup>          |                              |
| 5.29 – 7.29 <sup>3</sup>            | 0.08 $m_o$ <sup>6,7</sup>        |                              |

Where  $m_o = 9.109 \times 10^{-31}$  kg is the electron rest mass

### S3. Transient absorption spectra.

The contour plots of the pump-induced absorption change,  $\Delta A$ , spectra as a function of delay time, obtained at excitation fluences from  $\sim 1.1 \times 10^{14}$  to  $\sim 3.4 \times 10^{15}$  photons $\cdot$ cm $^{-2}$  for samples with average QD diameters of 3.8 nm, 5.8 nm and 8.9 nm are shown in figures S3, S4 and S5, respectively. As discussed in the main text, the main feature in the plots for sample with 3.8 nm average diameter (figure S3) is a strong bleach signal (negative  $\Delta A$ ) centered at around 500 nm. For the case of the samples with QD diameters of 5.8 nm and 8.9 nm, the bleach peaks are centered at approximately 560 nm and 840 nm, respectively.

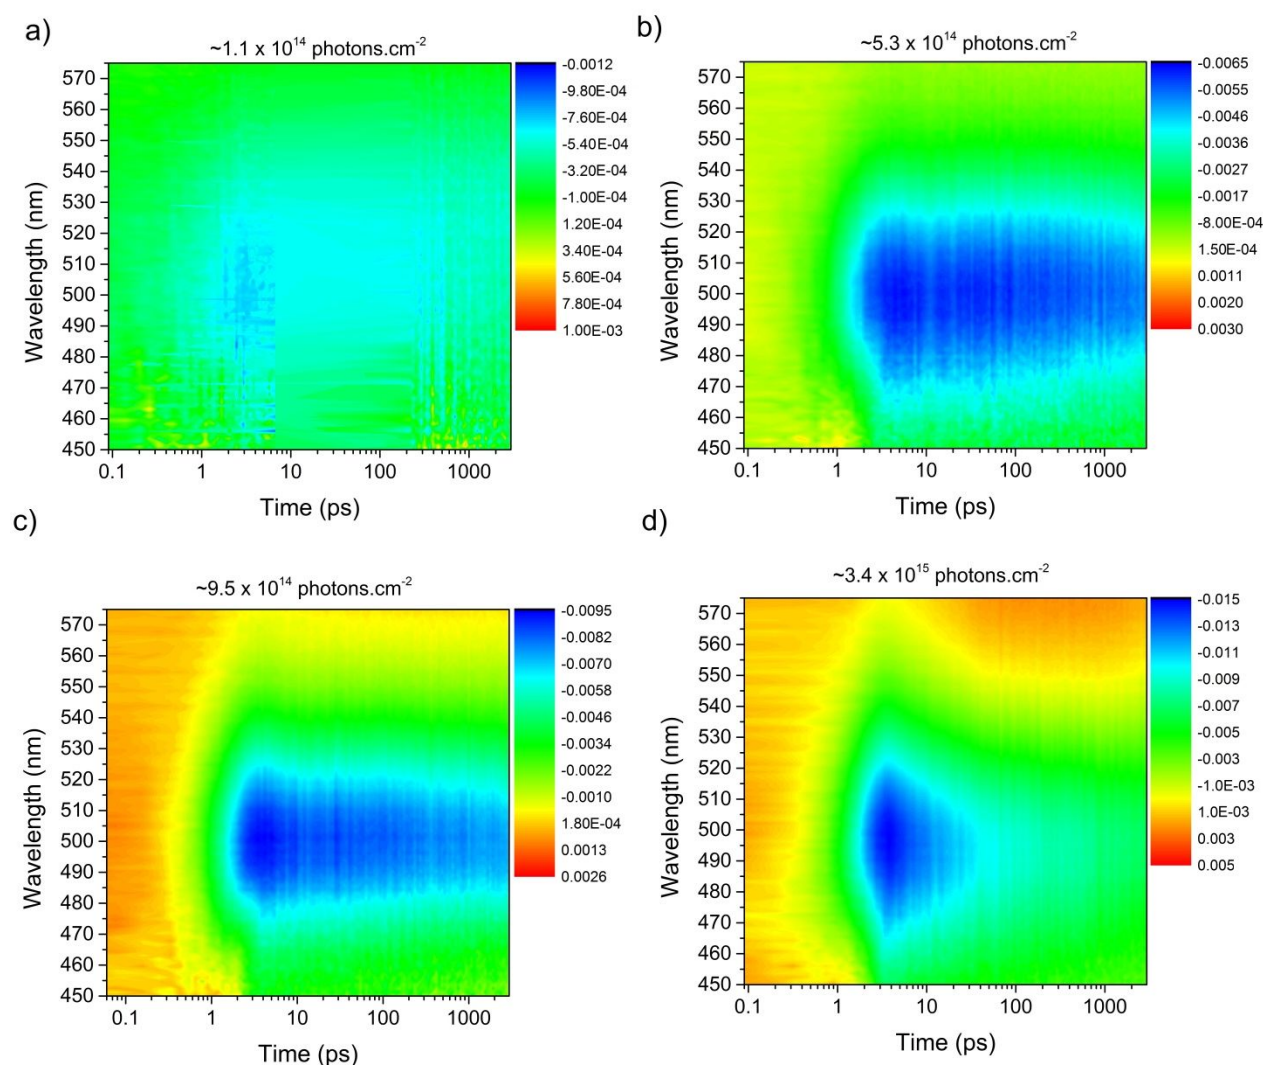

**Figure S3 a-d).** Contour plots of the change in absorption,  $\Delta A$  (in OD), as a function of wavelength and delay time recorded at different excitation fluence for sample with 3.8 nm average diameter.

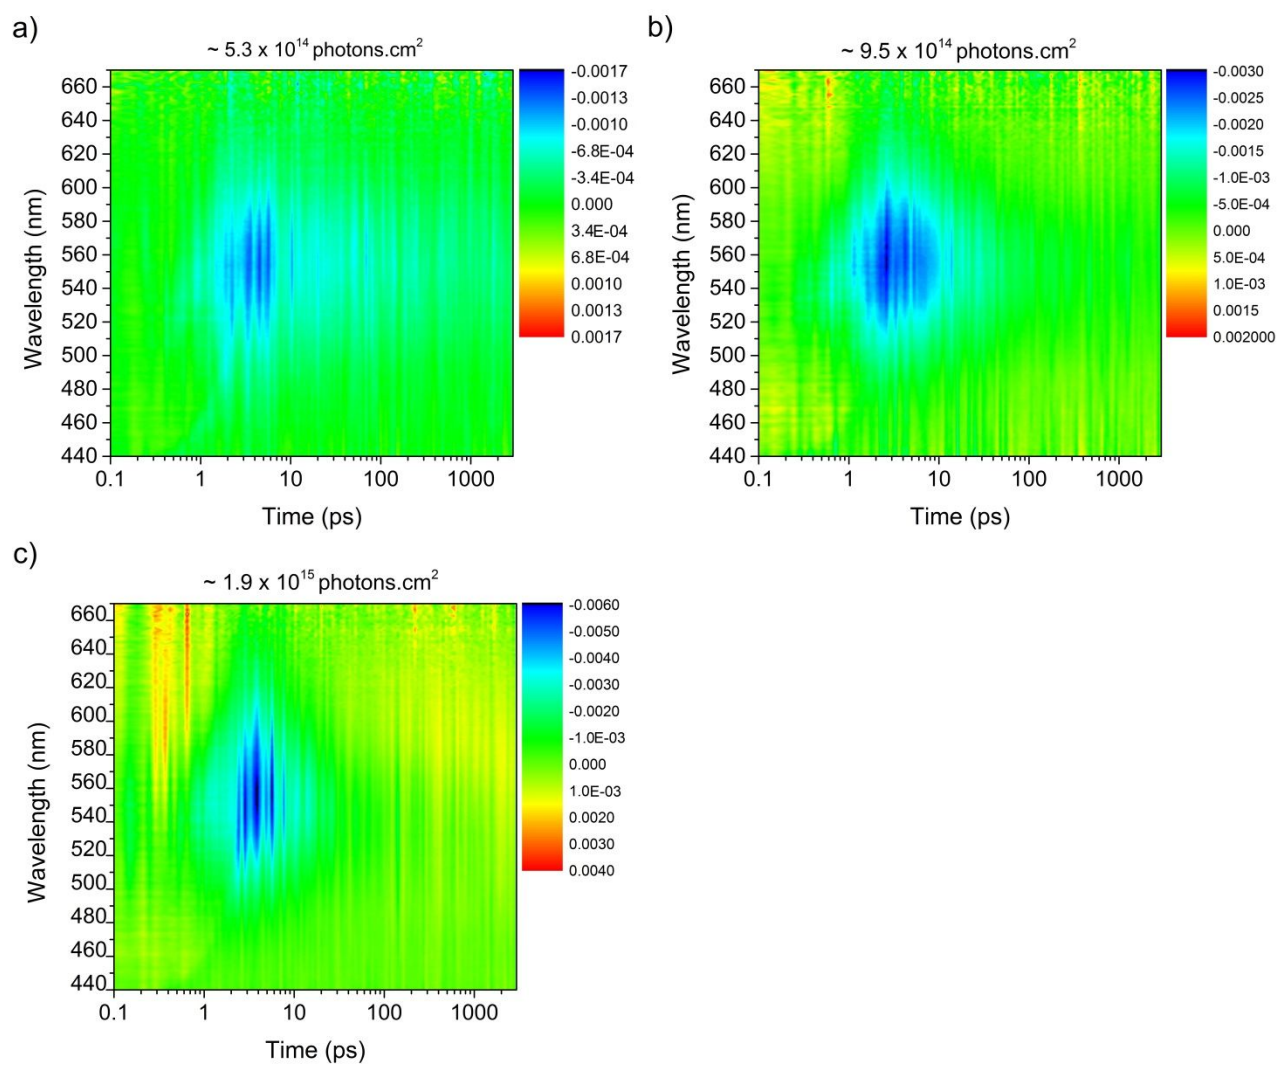

**Figure S4 a-c).** Contour plots of the change in absorption,  $\Delta A$  (in OD), as a function of wavelength and delay time recorded at different excitation fluence for sample with 5.8 nm average diameter.

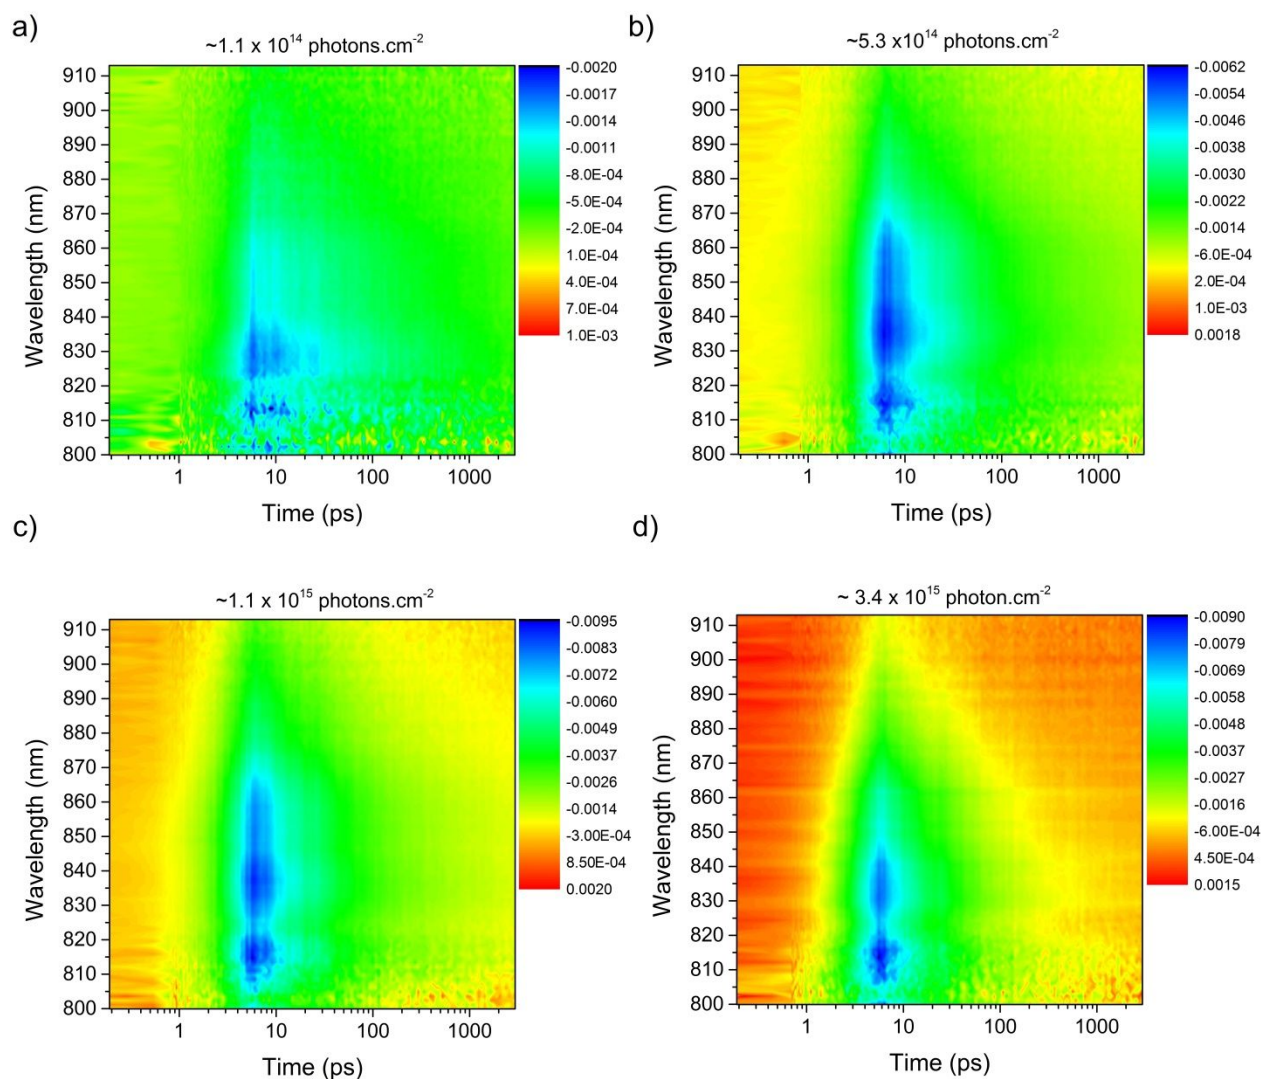

**Figure S5 a-d).** Contour plots of the change in absorption,  $\Delta A$  (in OD), as a function of wavelength and delay time recorded at different excitation fluence for sample with 8.9 nm average diameter.

Figure S6 shows the maximum fractional bleach,  $\Delta A/A$ , at the wavelengths of the CBM as a function of excitation fluence,  $J_p$ , for samples with 5.8 nm and 8.9 nm average diameters. A two-fold degeneracy and an absorption cross-section,  $\sigma$ , of  $1.3 \pm 0.3 \times 10^{-15} \text{ cm}^2$  and  $2.04 \pm 0.03 \times 10^{-15} \text{ cm}^2$  were determined for these samples, respectively as detailed in the main text.

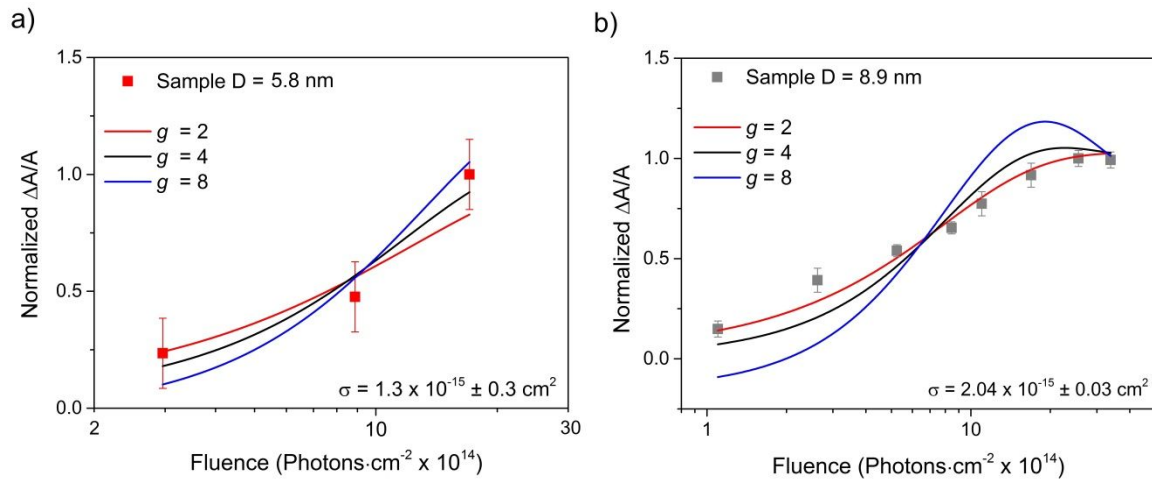

**Figure S6.** Normalized  $\Delta A/A$  as a function of excitation fluence for samples with a) 4.5 nm and b) 8.9 nm average diameters. Fits are to equation (1) presented in the main text.

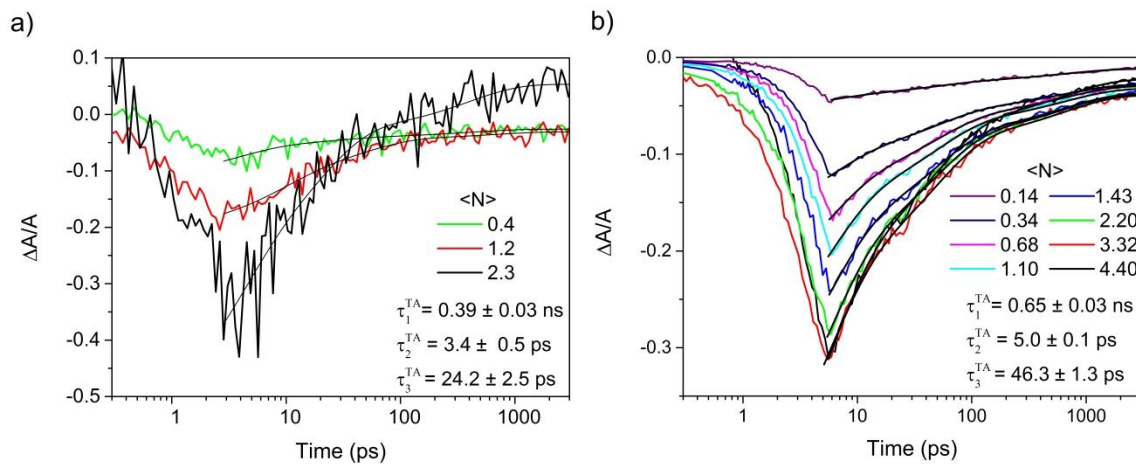

**Figure S7.** Fractional absorption change  $\Delta A/A$  transients at different excitation fluences ( $\langle N \rangle$ ) for the samples with a) 5.8 nm and b) 8.9 nm average diameters. Tri-exponential fits to the decays are shown as black lines.

### S3. Transient photoluminescence measurements.

The PL decay transients obtained with an excitation pulse of 420 nm and detecting at the PL emission peak of the samples with average diameters of 2.7 nm and 3.8 nm are shown in

figure S8. Both transients are well described by a tri-exponential decay function of the form

$$\tau_{PL} = y_0 + A_1 e^{-x/\tau_1} + A_2 e^{-x/\tau_2} + A_3 e^{-x/\tau_3},$$

where  $y_0$  is an offset,  $\tau_i^{PL}$  ( $i = 1, 2, 3$ ) are the

time constants and  $A_i$  are their corresponding amplitudes. The shortest of these time

constants,  $\tau_1^{PL}$  for the sample with average diameter of 3.8 nm corresponds to the longest

extracted from the TA measurements and identified as the lifetime of single excitons,  $\tau_1^{TA}$ .

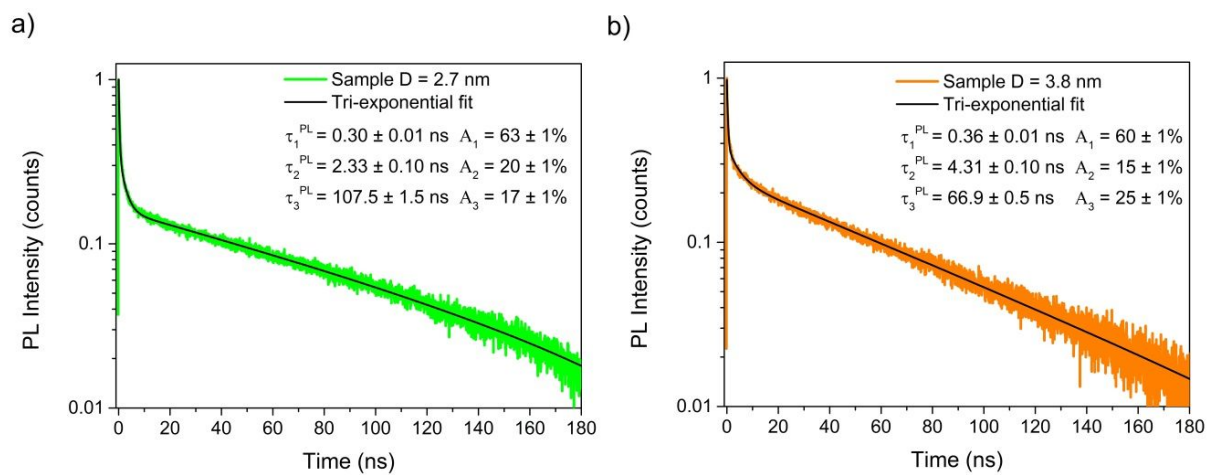

**Figure S8.** PL decays for samples with average diameters of a) 2.7 nm and b) 3.8 nm. Tri-exponential fits to the decays are shown as black lines.



#### S4 Band gap as a function of size

The values for band gap estimated from the second derivative of the absorbance are plotted as a function of the QD diameter in figure S9. These experimental data were fitted by the equation:

$$E_g(NC) = E_g(bulk) + \left( \frac{\pi^2 \hbar^2}{2m_r R^2} \right) - \frac{1}{\epsilon_r^2 m_0} R_y,$$

where  $m_r$  is the reduced mass,  $m_r = (m_e^{-1} + m_h^{-1})^{-1}$ ,  $R$  is the QDs radius,  $\epsilon_r$  is the dielectric constant and  $R_y$  is Rydberg's energy. The values of electron effective mass, band gap and dielectric constant were set as experimentally measured values from the literature<sup>1,3,4</sup> and are given in the figure. The value for hole effective mass was left to vary since no experimental values for it have yet been reported.

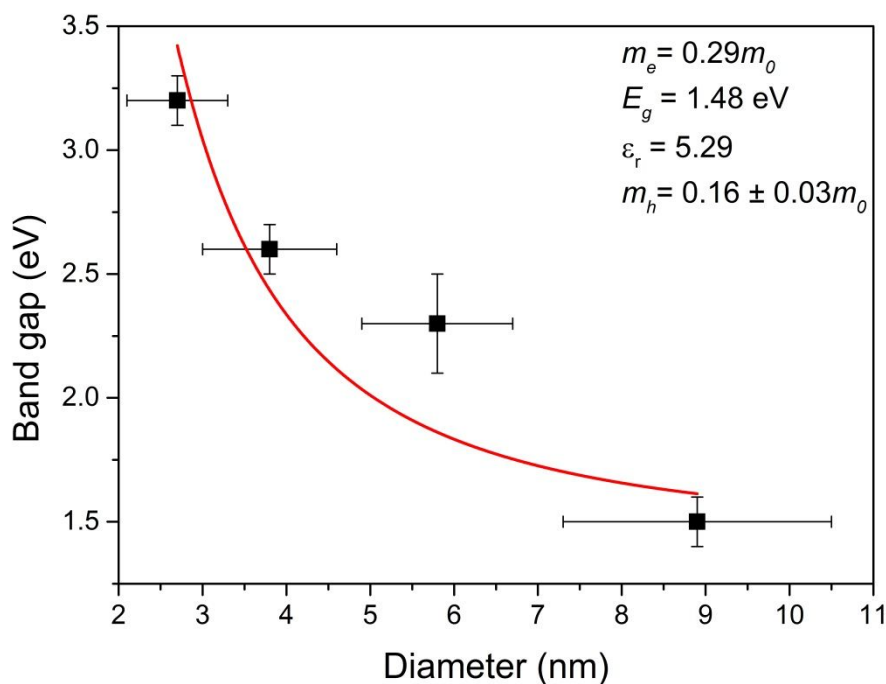

**Figure S9.** Band gap plotted as a function of diameter for  $Zn_3N_2$  QD samples. The red line is the fit to the effective mass model shown above.

## S5 Vibrational coupling

A Fast Fourier Transform (FFT) was performed on some representative TA decays to explore the possibility of exciton-phonon coupling in  $\text{Zn}_3\text{N}_2$ . As can be seen in figure S10, in all cases there is only one feature close to frequency values of zero, arising from the limited time window of the transient absorption experiments. No features indicating exciton coupling with either optical or acoustic phonons (such as those observed for CdSe QDs<sup>8</sup>), can be seen.

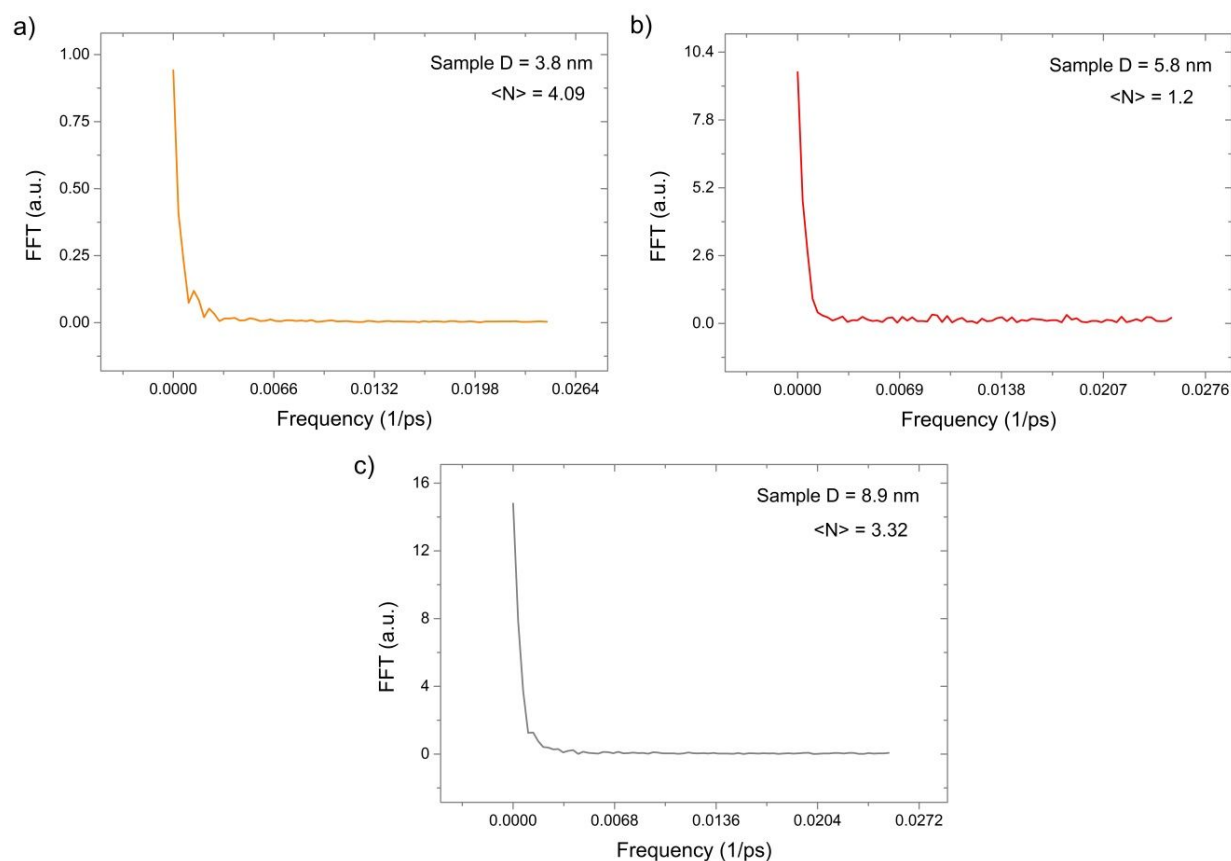

**Figure S10.** Fourier transform for selected fractional absorption change transients for  $\text{Zn}_3\text{N}_2$  samples a)  $D = 3.8$  nm, b)  $D = 5.8$  nm and c)  $D = 8.9$  nm. No features indicating exciton-phonon coupling are observed.

## References

- (1) Zervos, M.; Karipi, C.; Othonos, A. Zn<sub>3</sub>N<sub>2</sub> Nanowires: Growth, Properties and Oxidation. *Nanoscale Res. Lett.* **2013**, *56* (8), 4914–4919.
- (2) Ayouchi, R.; Casteleiro, C.; Santos, L.; Schwarz, R. RF-Plasma Assisted PLD Growth of Zn<sub>3</sub>N<sub>2</sub> Thin Films. *Phys. Status Solidi Curr. Top. Solid State Phys.* **2010**, *7* (9), 2294–2297.
- (3) Trapalis, A.; Heffernan, J.; Farrer, I.; Sharman, J.; Kean, A. Structural, Electrical, and Optical Characterization of as Grown and Oxidized Zinc Nitride Thin Films. *J. Appl. Phys.* **2016**, *120* (20), 205102 1-9.
- (4) Suda, T.; Kakishita, K. Band-Gap Energy and Electron Effective Mass of Polycrystalline Zn<sub>3</sub>N<sub>2</sub>. *J. Appl. Phys.* **2006**, *99* (7), 1–4.
- (5) Yamada, N.; Watarai, K.; Yamaguchi, T.; Sato, A.; Ninomiya, Y. Transparent Conducting Zinc Nitride Films. *Jpn. J. Appl. Phys.* **2014**, *53* (5 SPEC. ISSUE 1), 05FX01 1-5.
- (6) Kumagai, Y.; Harada, K.; Akamatsu, H.; Matsuzaki, K.; Oba, F. Carrier-Induced Band-Gap Variation and Point Defects in Zn<sub>3</sub>N<sub>2</sub> from First Principles. *Phys. Rev. Appl.* **2017**, *8* (1), 27–30.
- (7) Cao, X.; Yamaguchi, Y.; Ninomiya, Y.; Yamada, N. Comparative Study of Electron Transport Mechanisms in Epitaxial and Polycrystalline Zinc Nitride Films. *J. Appl. Phys.* **2016**, *119* (2), 025104 1-10.
- (8) Sagar, D. M.; Cooney, R. R.; Sewall, S. L.; Kambhampati, P. State-Resolved Exciton-Phonon Couplings in CdSe Semiconductor Quantum Dots. *J. Phys. Chem. C* **2008**, *112* (25), 9124–9127.
